# Supplementary figures and images for: Defined plant extracts can protect human cells against combined xenobiotic effects
Source: Springer Nature journal article supplement (doi:10.1186/1745-6673-6-3), 2011-01-20

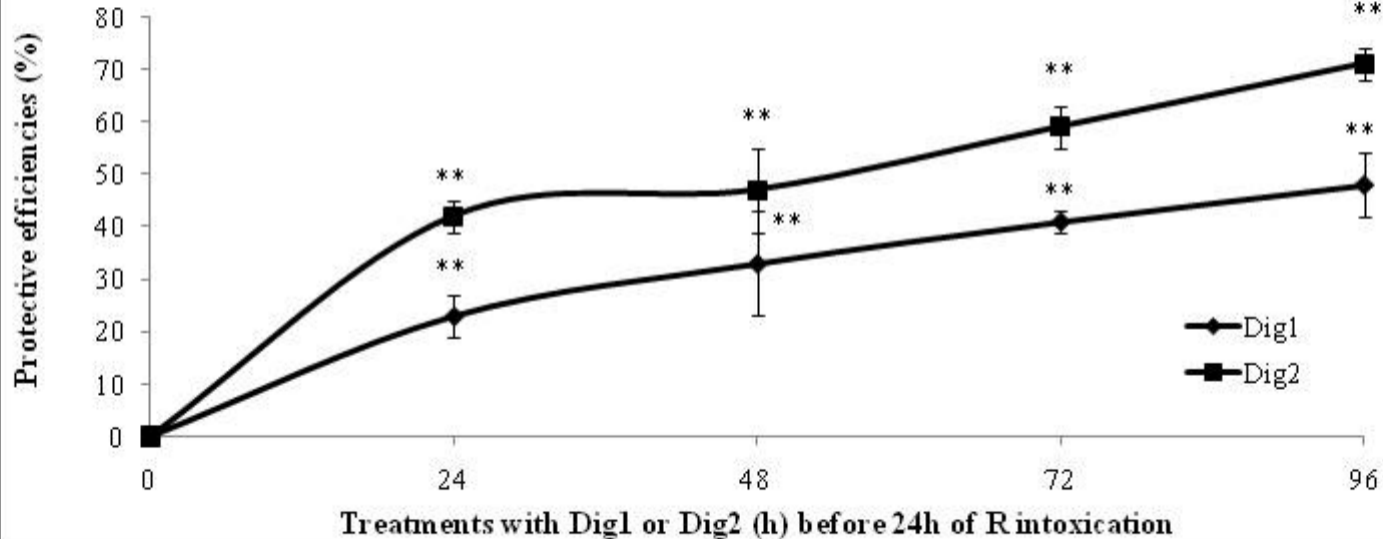

Supplement: 12995_2010_154_MOESM2_ESM.pdf [file 12995_2010_154_MOESM2_ESM.pdf]

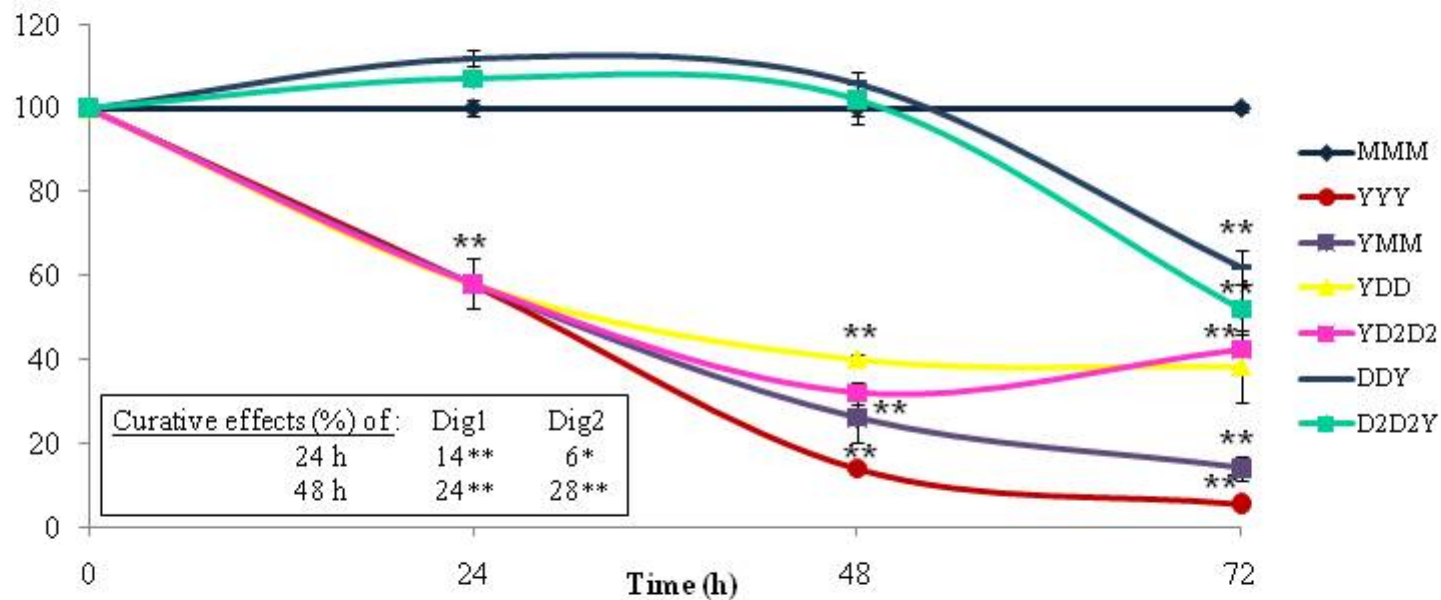

Supplement: 12995_2010_154_MOESM3_ESM.pdf [file 12995_2010_154_MOESM3_ESM.pdf]

G\* in cells (%)

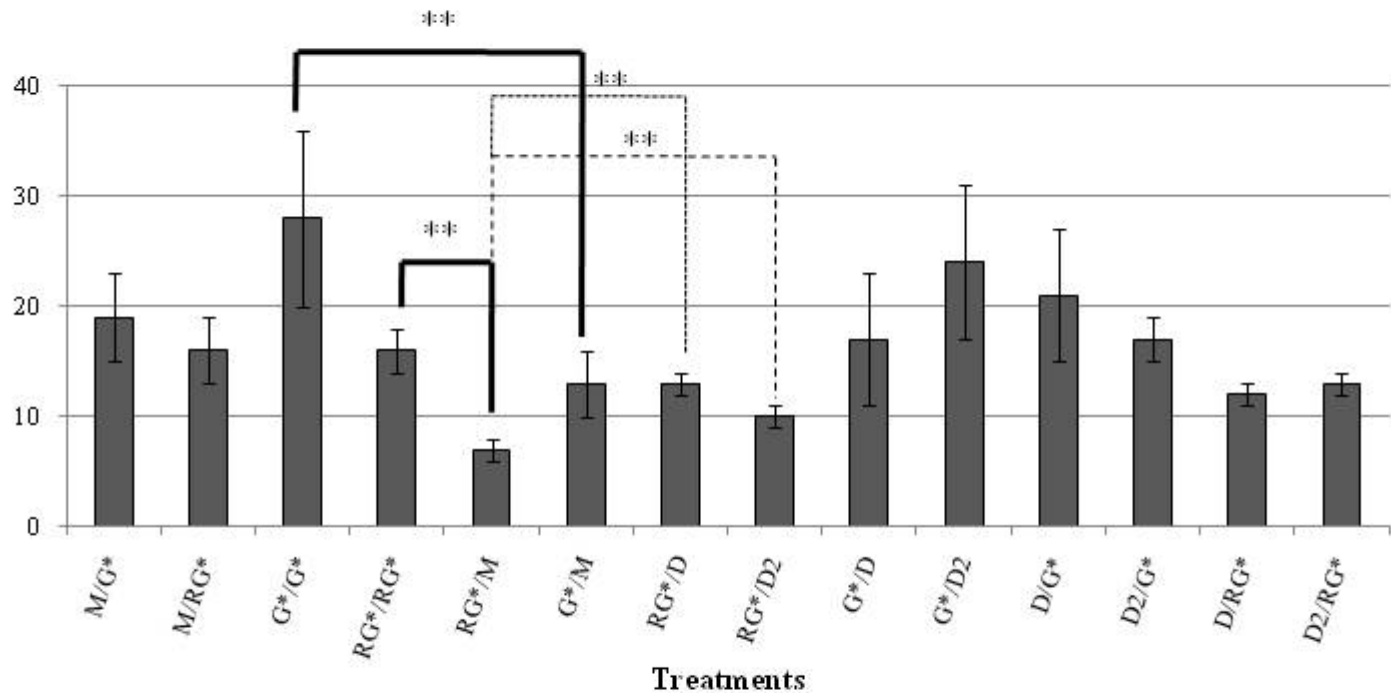

Supplement: 12995_2010_154_MOESM4_ESM.pdf [file 12995_2010_154_MOESM4_ESM.pdf]

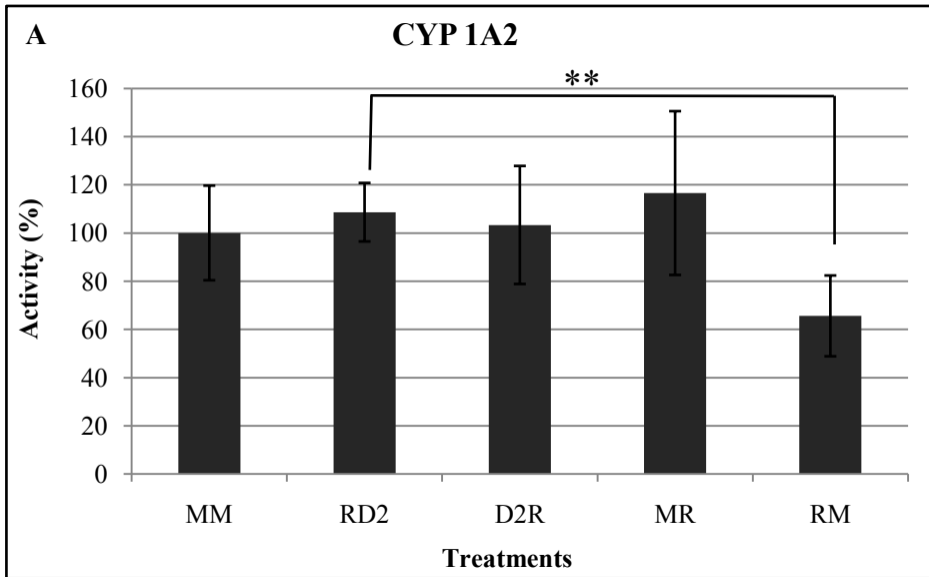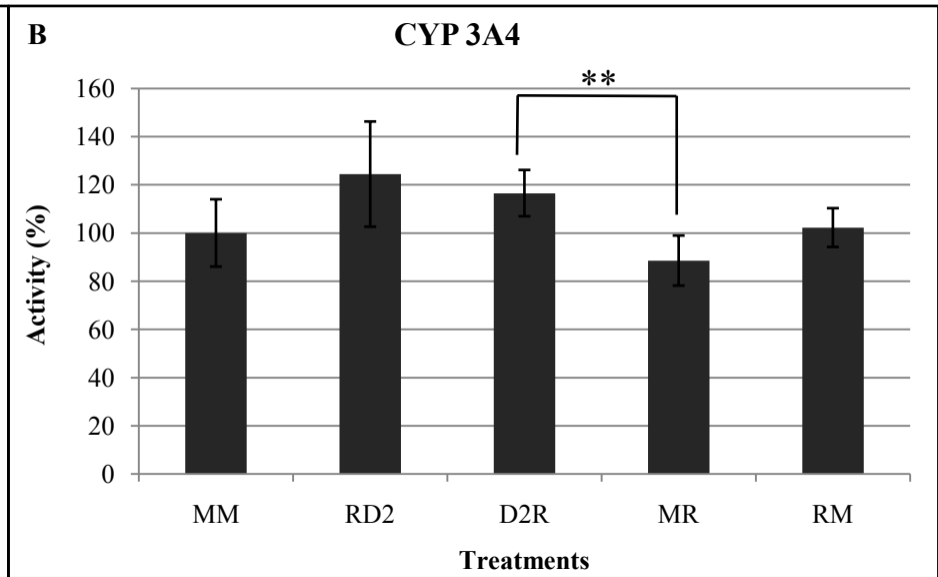

Supplement: 12995_2010_154_MOESM5_ESM.pdf [file 12995_2010_154_MOESM5_ESM.pdf]

# GST

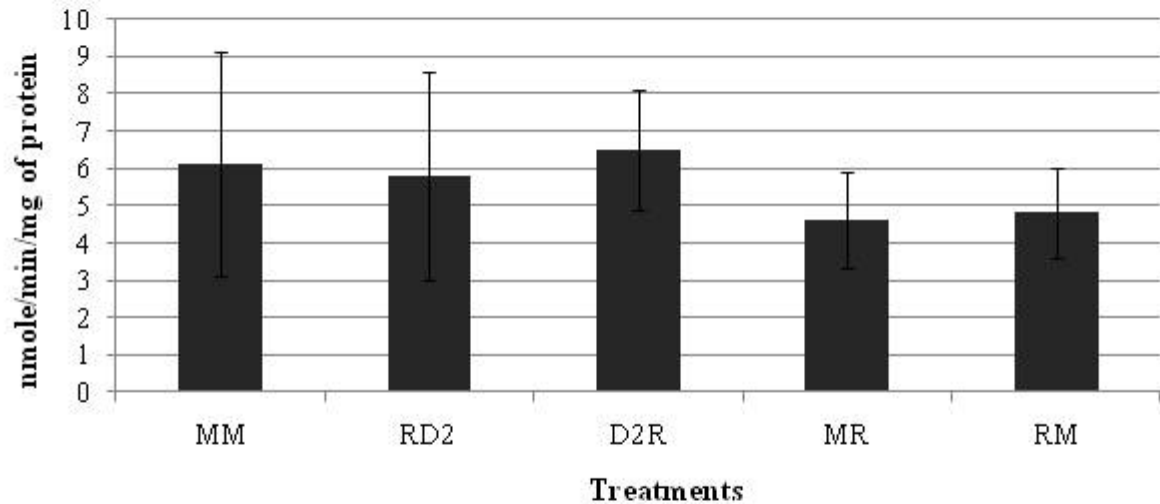

Supplement: 12995_2010_154_MOESM6_ESM.pdf [file 12995_2010_154_MOESM6_ESM.pdf]
